# Supplementary material for: The Lysine Methyltransferase SMYD2 Is Required for Definite Hematopoietic Stem Cell Production in the Mouse Embryo
Source: MDPI journal article supplement (doi:10.3390/vetsci7030100), 2020-07-25
Supplement: s1 [file s1]

Article

## The lysine methyltransferase SMYD2 is required for definite Hematopoietic Stem Cell production in the mouse embryo

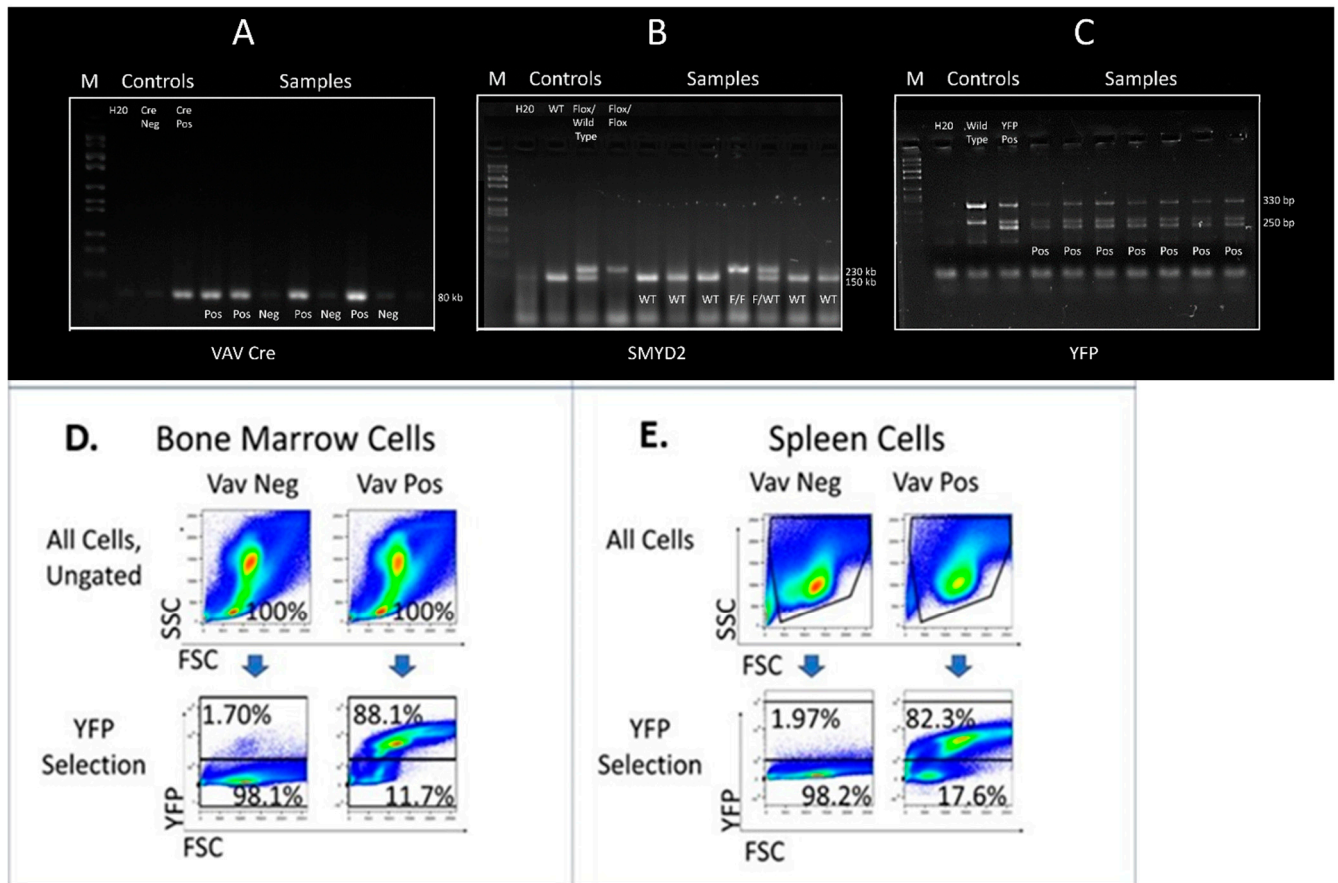

**Figure S1. Assessment of *vav*-Cre conditional knockout efficiency of *Smyd2*.** **A.** The presence of the flanked lox P sites on exon 2 of *Smyd2* were confirmed via PCR. Lanes 1: Standard 1kb ladder followed by a non-template and additional controls. Upper panels: *Cre* recombination alleles. Middle panels: *Smyd2*. Lower panels: *YFP* (selectable marker). Primers: 5'GGTCTGGCTTTGGAGTTGAGCC3'; 5'GAGCTTCGTGGAGTGCA GGAC3'. Conditions: 94°C x 5' (94°C x 30 min., 62°C x 30 min., 72°C x 30") x 35 min; cycles, 72°C x 7 min. **B, C.** The *YFP* marker utilized to measure the deletion efficiency of *Smyd2* via PCR. Primers: 5'GGAGCGGGAGAAATGGATATG3'; 5'AAAGTCGCTCTGAGTTGTTAT3'; 5'AAGACCGCGAAGAGTTTGT3' Conditions: 94°C x 5 min (94°C x 30 min, 58°C x 1min, 72°C x 1min) x 35 cycles, 72°C x 7 min. All PCR products were analyzed via gel electrophoresis. 15ul of each sample and loading dye was run on a 2.0% agarose gel with the addition of ethidium bromide. Electrophoresis: 100v for ~30 min; visualization, UV. **D, E.** Representative *Cre* deletion efficiencies monitored in bone marrow and spleen via FACS analyses of *YFP*<sup>LSL</sup>. 100% of the cell sample population from either murine bone marrow or spleen viewed as side scatter (SSC) versus forward scatter (FSC). Left columns of each panel (*Vav*-Neg) are *Smyd2*<sup>flx/flx</sup> controls, whereas the right columns of each panel show percentages of *Smyd2*<sup>flx/flx</sup>*Vav*-*Cre* deletion. The internal *YFP* stop allele allows production of fluorescence following *Smyd2* deletion prior to extracellular staining. BM deletion frequencies ranged from 75-88%, whereas splenic deletion frequencies ranged from 61-82%.

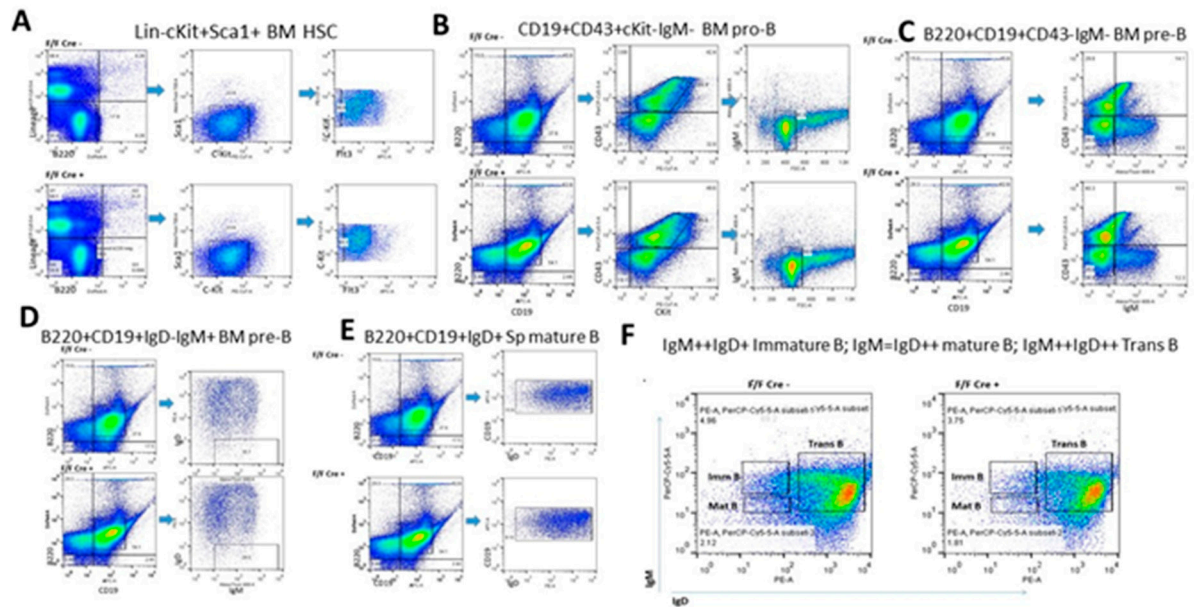

**Figure S2. Analysis of hematopoietic populations following SMYD2 deletion with *vav-Cre*.** We crossed *Smyd2<sup>fl/fl</sup>* mice with *Vav-Cre* mice (JAX stock #008610), which initiates recombination within E12.5 embryonic epithelium determined FACS profiles. Cells were sorted based on expression of YFP generated by crosses of *Rosa26-Lox-Stop-Lox-YFP* (*YFP<sup>LSL</sup>*) reporter mice (S-Fig.1). S-Figure 3 provides the stain combinations employed to identify population detection by flow cytometry. **A.** Lin-cKit+Sca1+ BM HSC adult BM HSC; **B.** CD19+CD43+cKit-IgM- BM pro-B cells; **C.** B220+CD19+CD43-IgM- BM large pre-B cells; **D.** B220+CD19+IgD-IgM+ BM small pre-B cells; **E.** B220+CD19+IgD+ Splenic (Sp) mature B cells; **F.** IgM<sup>hi</sup>IgD<sup>low</sup> immature Sp B cells; IgM<sup>low</sup>IgD<sup>hi</sup> Sp mature B cells; IgM<sup>hi</sup>IgD<sup>hi</sup> transitional (Trans) Sp B cells. Total cell numbers were determined as: Total # femur/spleen/thymus cells harvested/sample X number of cells/gate. Statistical analyses performed by student's t-test on 4-6 experimental replicates; \*p≤0.05; \*\*p≤0.005; \*\*\*p≤0.001.

| Tissue                                             | Population                             | Population Abbr                                                              | Marker                                                                                                     | Lineage                     |
|----------------------------------------------------|----------------------------------------|------------------------------------------------------------------------------|------------------------------------------------------------------------------------------------------------|-----------------------------|
| B<br>o<br>n<br>e<br><br>M<br>a<br>r<br>r<br>o<br>w | Hematopoietic stem cell                | HSC                                                                          | Lin <sup>-</sup> Sca1 <sup>+</sup> ckit <sup>+</sup> FIt3 <sup>-</sup>                                     | B220, CD19, CD3e, CD4,      |
|                                                    | Multipotent progenitor                 | MPP                                                                          | Lin <sup>-</sup> Sca1 <sup>+</sup> ckit <sup>+</sup> FIt3 <sup>int</sup>                                   | CD8a, CD11b, Gr1, NK1.1,    |
|                                                    | Lymphoid primed multipotent progenitor | LMPP                                                                         | Lin <sup>-</sup> Sca1 <sup>+</sup> ckit <sup>+</sup> FIt3 <sup>hi</sup>                                    | Ter119                      |
|                                                    | Common lymphoid progenitor             | CLP                                                                          | Lin <sup>-</sup> FIt3 <sup>+</sup> IL-7 <sup>+</sup> Sca1 <sup>low</sup> +ckit <sup>low</sup>              |                             |
|                                                    | Common myeloid progenitor              | CMP                                                                          | Lin <sup>-</sup> Sca1 <sup>-</sup> ckit <sup>+</sup> FcyR <sup>int</sup> CD34 <sup>int</sup>               |                             |
|                                                    | Granulocyte/macrophage progenitor      | GMP                                                                          | Lin <sup>-</sup> Sca1 <sup>-</sup> ckit <sup>+</sup> FcyR <sup>hi</sup> CD34 <sup>hi</sup>                 |                             |
|                                                    | Megakaryocyte/erythroid progenitor     | MEP                                                                          | Lin <sup>-</sup> Sca1 <sup>-</sup> ckit <sup>+</sup> FcyR <sup>low</sup> CD34 <sup>low</sup>               |                             |
|                                                    | Progenitor B cell                      | Pro-B                                                                        | B220 <sup>+</sup> CD19 <sup>-</sup> CD43 <sup>+</sup> ckit <sup>+</sup> IgM <sup>-</sup>                   |                             |
|                                                    | Pre B cell                             | Pre-B                                                                        | B220 <sup>+</sup> CD19 <sup>+</sup> CD43 <sup>-</sup> IgM <sup>-</sup>                                     |                             |
|                                                    | Large Pre-B                            | Large Pre-B                                                                  | B220 <sup>+</sup> CD19 <sup>+</sup> CD43 <sup>+</sup> IgM <sup>-</sup> BP1 <sup>+</sup>                    |                             |
|                                                    | Small Pre-B                            | Small Pre-B                                                                  | B220 <sup>+</sup> CD19 <sup>+</sup> CD43 <sup>-</sup> IgM <sup>-</sup> CD2 <sup>-</sup>                    |                             |
|                                                    | Immature B cell                        | Imm B                                                                        | B220 <sup>+</sup> CD19 <sup>+</sup> CD43 <sup>-</sup> IgM <sup>hi</sup> IgD <sup>-</sup>                   |                             |
|                                                    | Mature B cell or Recirculating B cell  | Mat B or Recirc                                                              | B220 <sup>+</sup> CD19 <sup>+</sup> IgM <sup>hi</sup> IgD <sup>+</sup>                                     |                             |
|                                                    | Macrophage                             | Macro                                                                        | Mac1 <sup>+</sup> Gr1 <sup>low</sup> CD115 <sup>+</sup>                                                    |                             |
| Granulocytes                                       | Gran                                   | Mac1 <sup>+</sup> Gr1 <sup>hi</sup> CD115 <sup>-</sup>                       |                                                                                                            |                             |
| Plasmacytoid dendritic cell                        | pDC                                    | CD11b <sup>-</sup> CD11c <sup>low</sup> B220 <sup>+</sup> PDCA1 <sup>+</sup> |                                                                                                            |                             |
| T<br>h<br>y<br>m<br>u<br>s                         | Double negative                        | DN                                                                           | CD4 <sup>-</sup> CD8 <sup>-</sup>                                                                          | B220, CD19, CD3e, CD8a      |
|                                                    | Double positive                        | DP                                                                           | CD4 <sup>+</sup> CD8 <sup>+</sup>                                                                          | TCRB, TCRyΔ, CD11b, NK1.1,  |
|                                                    | Helper T cells                         | CD4+                                                                         | CD4 <sup>+</sup> CD8 <sup>-</sup>                                                                          | Ly-6G, CD11b, CD11c, Ter119 |
|                                                    | Cytotoxic T cells                      | CD8+                                                                         | CD4 <sup>-</sup> CD8 <sup>+</sup>                                                                          |                             |
| S<br>p<br>l<br>e<br>e<br>n                         | Immature B cell                        | Imm B                                                                        | B220 <sup>+</sup> CD19 <sup>+</sup> IgM <sup>hi</sup> IgD <sup>-</sup>                                     |                             |
|                                                    | Transitional B cell 1                  | Trans B 1                                                                    | B220 <sup>+</sup> CD19 <sup>+</sup> IgM <sup>hi</sup> IgD <sup>-</sup> CD21 <sup>-</sup> CD23 <sup>-</sup> |                             |
|                                                    | Transitional B cell 2                  | Trans B 2                                                                    | B220 <sup>+</sup> CD19 <sup>+</sup> IgM <sup>hi</sup> IgD <sup>+</sup> CD21 <sup>+</sup> CD23 <sup>+</sup> |                             |
|                                                    | Mature B cell or Recirculating B cell  | Mat B or Recirc                                                              | B220 <sup>+</sup> CD19 <sup>+</sup> IgM <sup>hi</sup> IgD <sup>hi</sup>                                    |                             |
|                                                    | Follicular B cell                      | FO B                                                                         | B220 <sup>+</sup> CD19 <sup>+</sup> CD21 <sup>int</sup> CD23 <sup>hi</sup>                                 |                             |
| Marginal zone B cell                               | MZ B                                   | B220 <sup>+</sup> CD19 <sup>+</sup> CD21 <sup>hi</sup> CD23 <sup>low</sup>   |                                                                                                            |                             |

**Figure S3.** Hematopoietic population definitions and antibody conjugates employed for their detection by flow cytometry. Sources of antibodies noted in S-Methods.

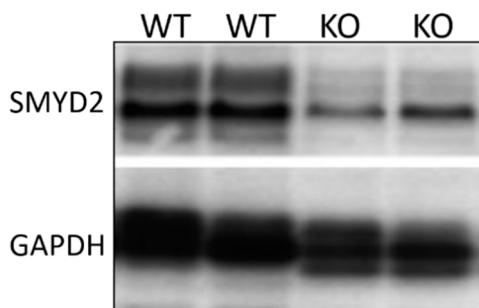

**Figure S4.** Protein deletion efficacy. Western blotting confirms reduction of SMYD2 in CKO detected by anti-SMYD2 serum relative to WT. Protein lysates were prepared and fractionated as previously described [11] on 12.5% SDS-PAGE. Following transfer to nylon, individual lanes were excised and blotted with the following commercial anti-human (h) antibodies: Anti-SMYD2 (ab108217; Abcam); and anti-GAPDH (ab181602; Abcam). After SDS-PAGE and transfer to nitrocellulose, blots were blocked with BSA (10% w/v), and then developed by chemiluminescence (Clarity Western ECL Substrate, Bio-Rad) with exposure time based on brightness of bands.
